# Supplementary material
Source: PubMed Central journal article supplement (PMC4047178)
Supplement: NIHMS550521-supplement-1.pdf [file NIHMS550521-supplement-1.pdf]

# Constituents of an Extract of *Cryptocarya rubra* Housed in a Repository with Cytotoxic and Glucose Transport Inhibitory Effects<sup>#</sup>

Yulin Ren,<sup>†</sup> Chunhua Yuan,<sup>‡</sup> Yanrong Qian,<sup>§,⊥,||</sup> Hee-Byung Chai,<sup>†</sup> Xiaozhuo Chen,<sup>§,⊥,||,∇</sup>

Michael Goetz,<sup>○</sup> and A. Douglas Kinghorn<sup>\*,†</sup>

<sup>†</sup>Division of Medicinal Chemistry and Pharmacognosy, College of Pharmacy, The Ohio State University, Columbus, OH 43210, United States

<sup>‡</sup>Campus Chemical Instrument Center, The Ohio State University, Columbus, OH 43210, United States

<sup>§</sup>Department of Chemistry and Biochemistry, Ohio University, Athens, OH 45701, United States

<sup>⊥</sup>Edison Biotechnology Institute, Ohio University, Athens, OH 45701, United States

<sup>||</sup>Molecular and Cellular Biology Program, Ohio University, Athens, OH 45701, United States

<sup>∇</sup>Department of Biomedical Sciences, Ohio University, Athens, OH 45701, United States

<sup>○</sup>Natural Products Discovery Institute, Institute for Hepatitis and Virus Research, Doylestown, PA 18902, United States

<sup>#</sup>Dedicated to Professor Otto Sticher, of ETH-Zurich, Zurich, Switzerland, for his pioneering work in pharmacognosy and phytochemistry.

## Content of Supporting Information

**Figure S1.** MS spectrum of (–)-rubrichalcolactone (**1**).

**Figure S2.** NMR spectra of (–)-rubrichalcolactone (**1**).

**Figure S3.** MS spectrum of 1,16-hexadecanediol-di-*p*-coumaroate (**2**).

**Figure S4.** NMR spectra of 1,16-hexadecanediol-di-*p*-coumaroate (**2**).

**Figure S5.** Structures indicating the conformation of the ring systems based on Dreiding models for **1**.

**Figure S6.** COSY and key HMBC correlations of **3** and **4**.

**Table S1–S3.** <sup>1</sup>H and <sup>13</sup>C NMR spectroscopic data of known compounds isolated from *C. rubra*.

Analytical data of known compounds isolated from *C. rubra*.

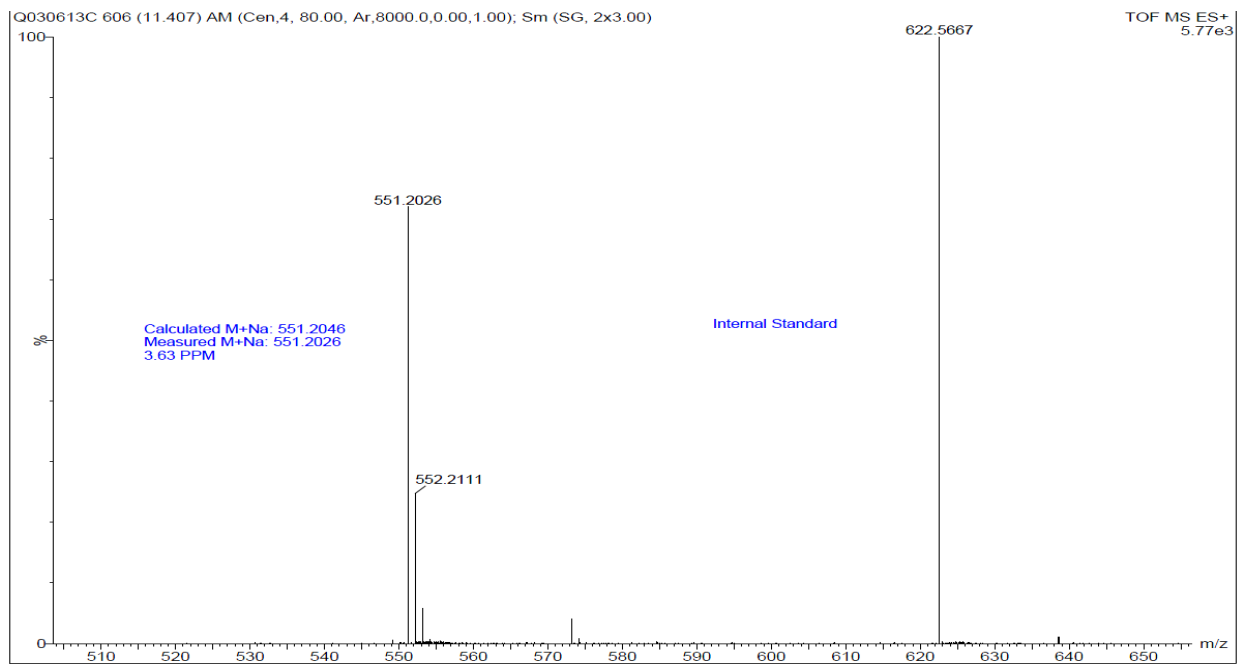

Figure S1. MS spectrum of (-)-rubrichalcolactone (**1**).

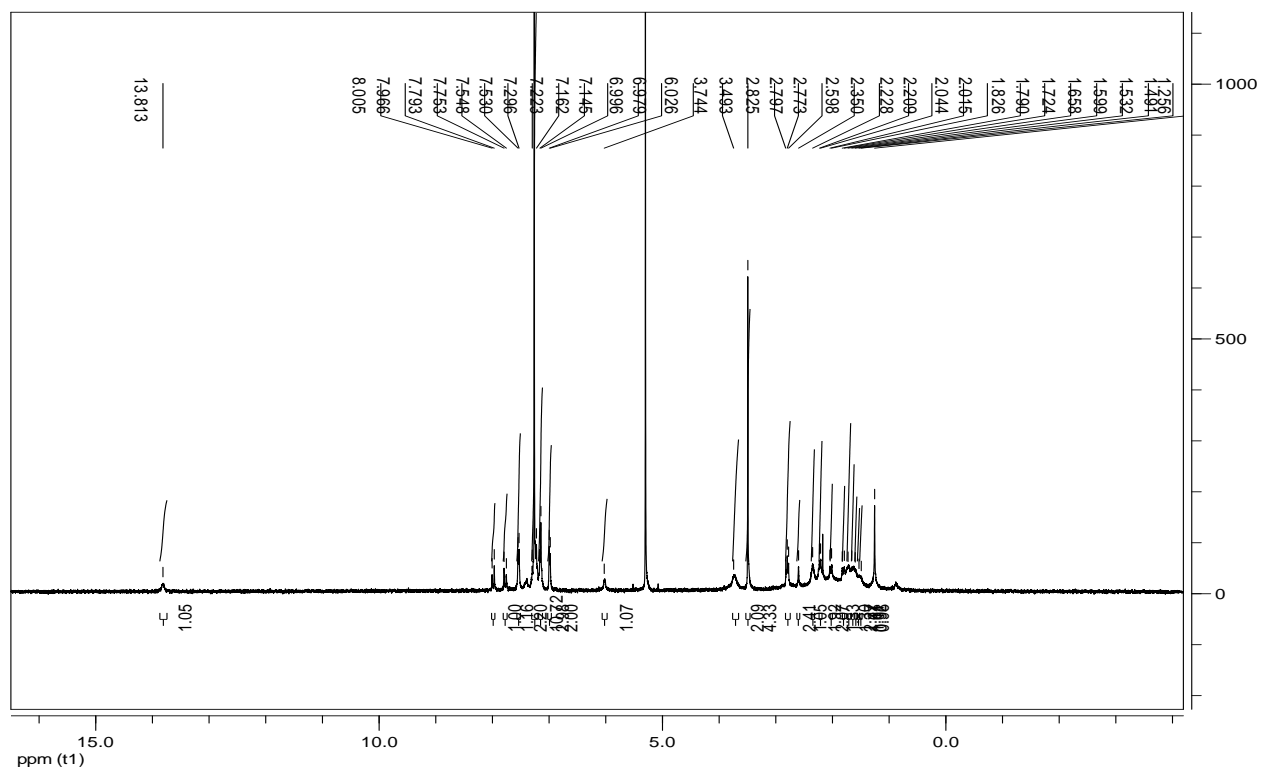



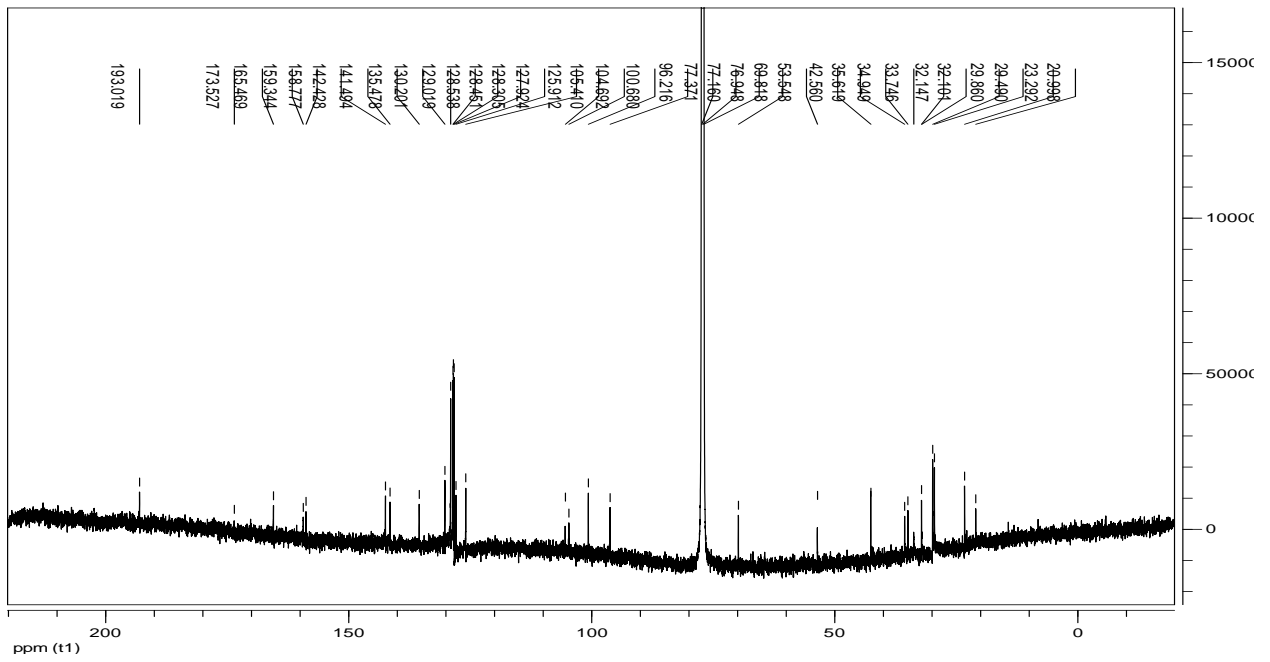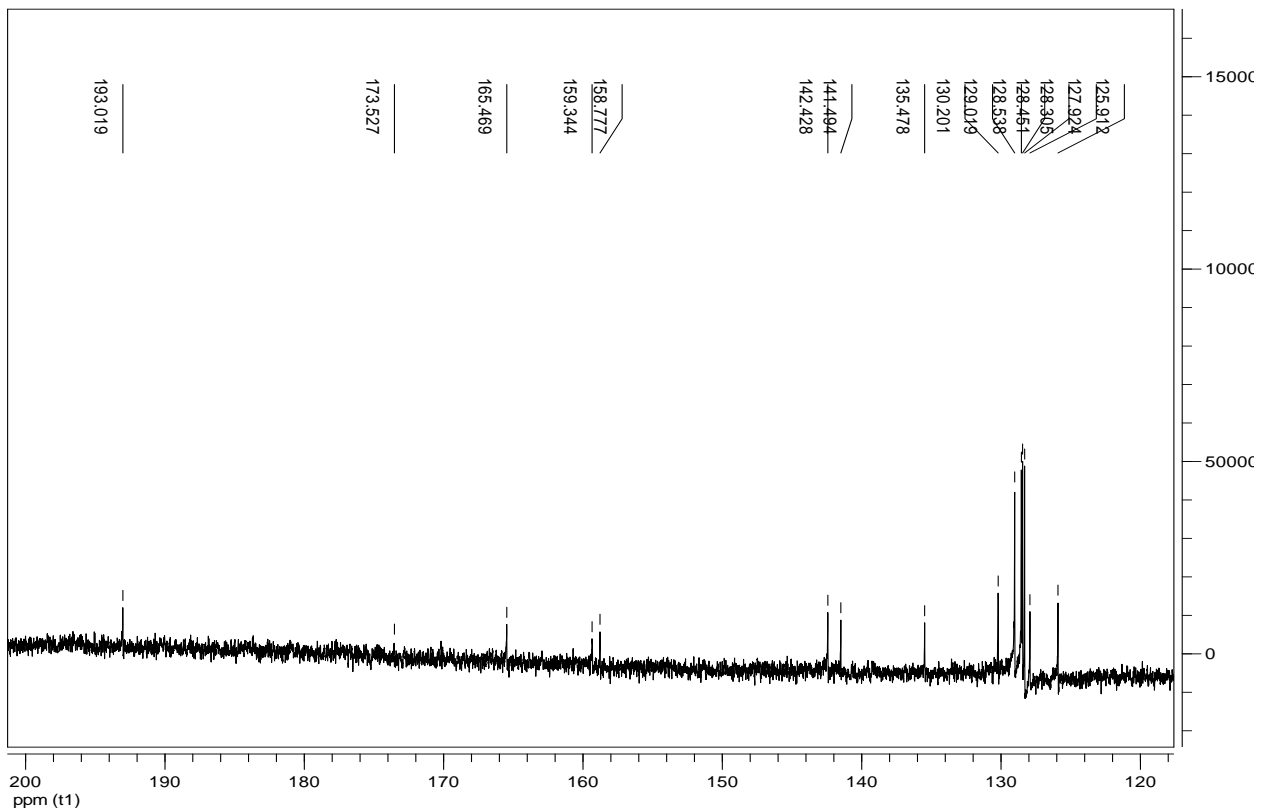

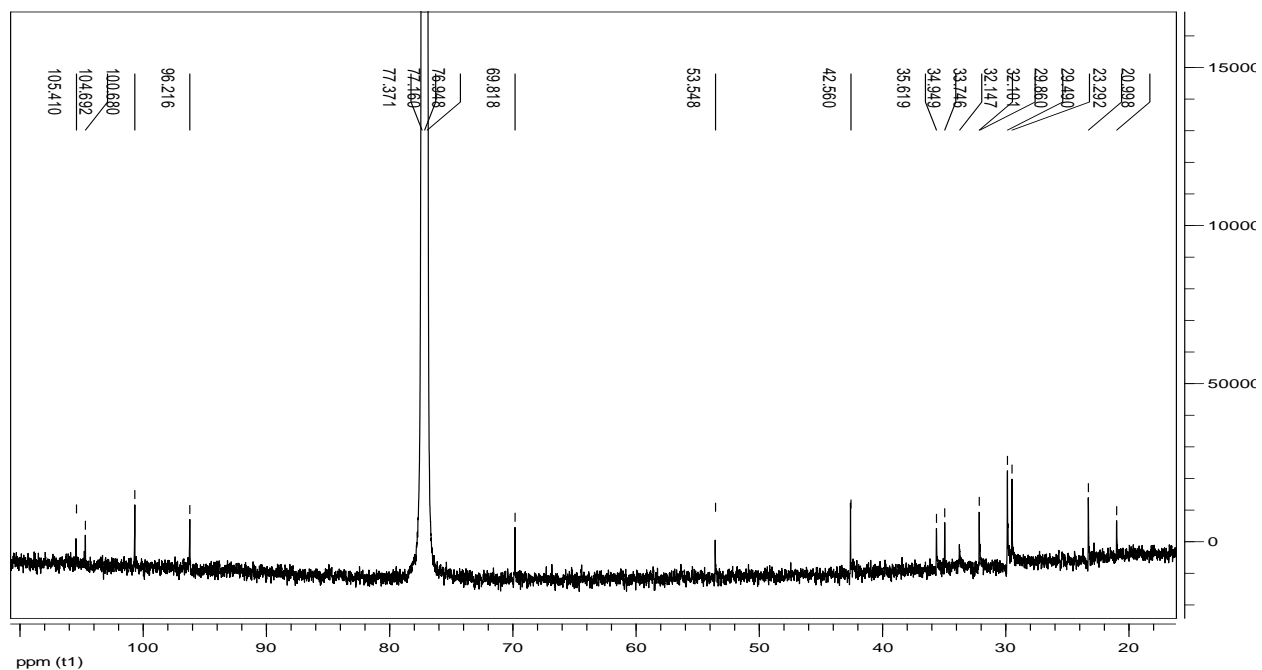

**Figure S2b.**  $^{13}\text{C}$  NMR spectrum of (-)-rubrichalcolactone (**1**).

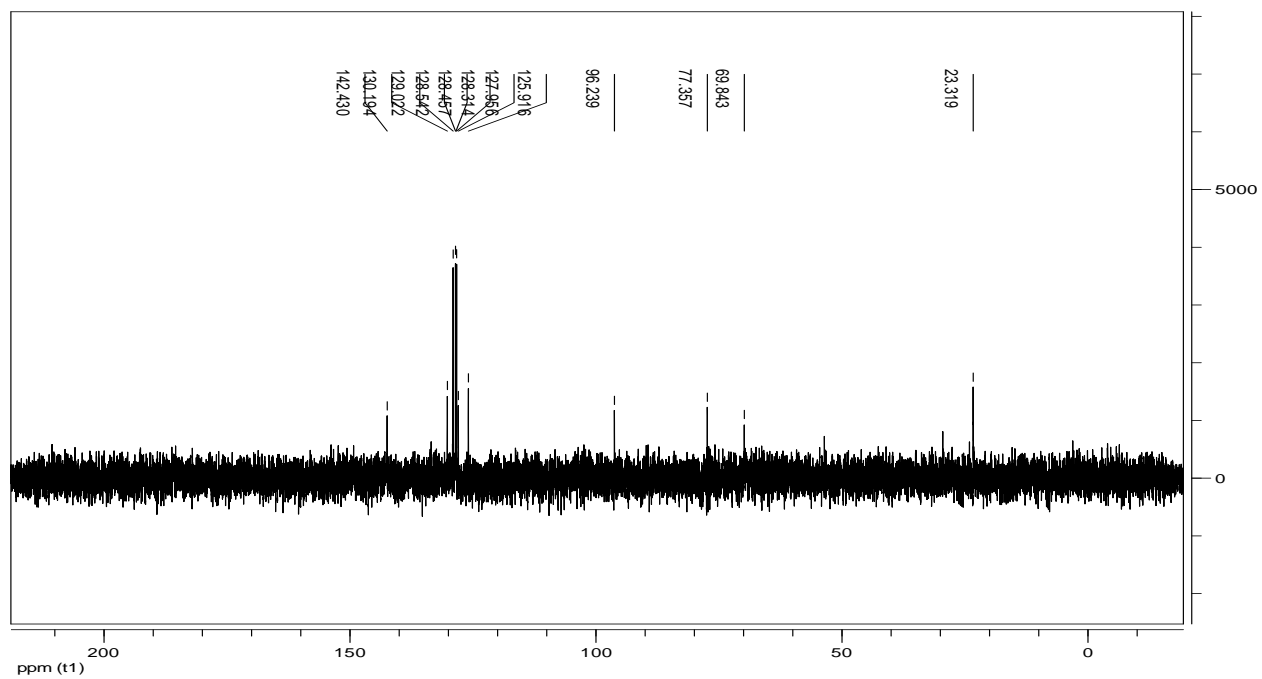

**Figure S2c.** DEPT 90 NMR spectrum of (-)-rubrichalcolactone (**1**).

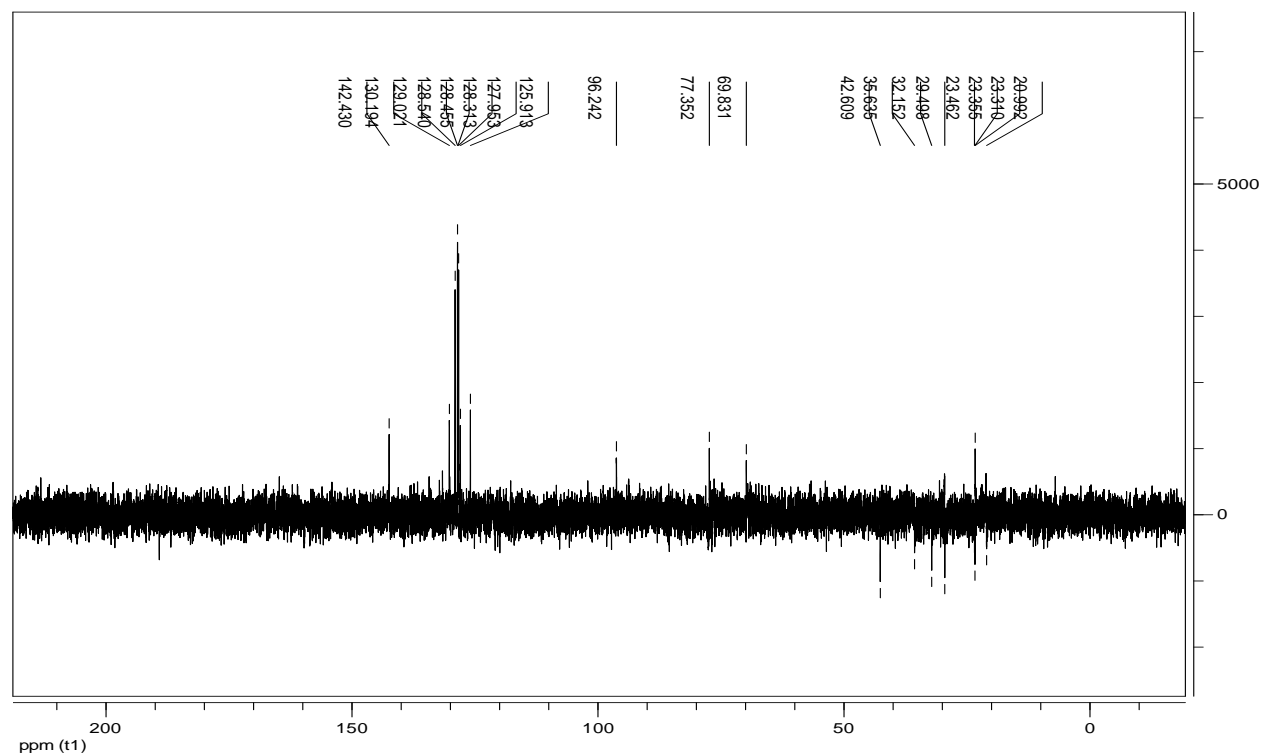

Figure S2d. DEPT 135 NMR spectrum of (-)-rubrichalcolactone (**1**).

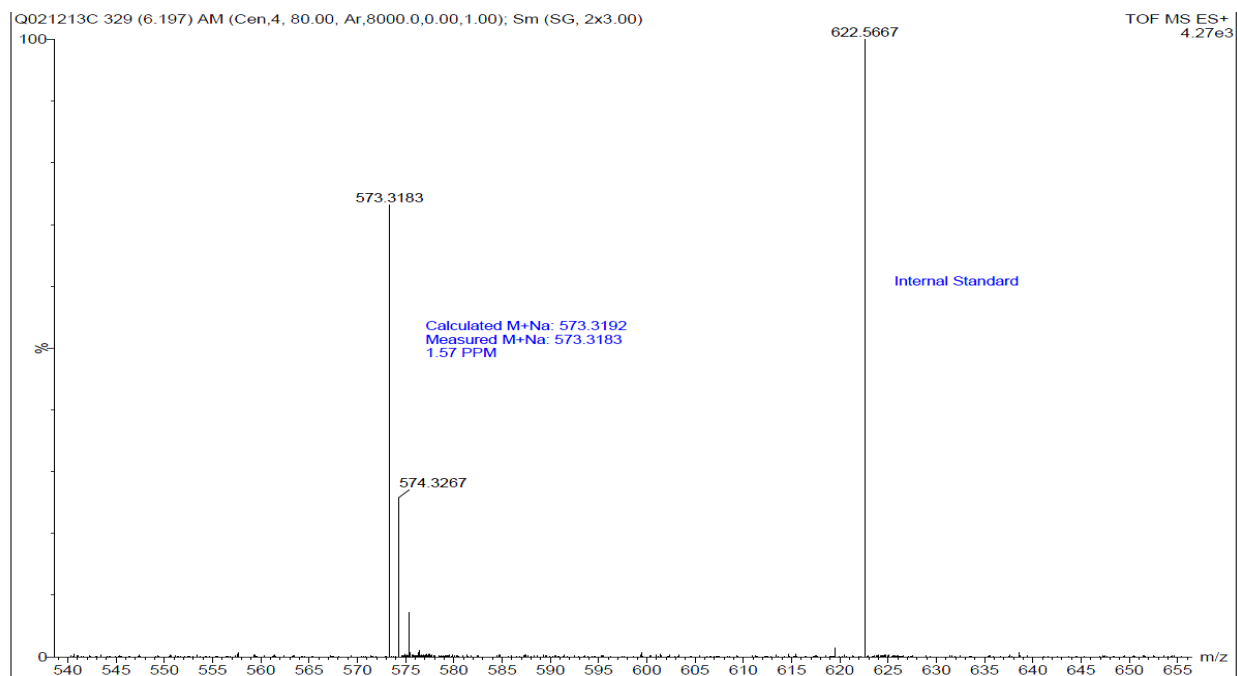

Figure S3. MS spectrum of 1,16-hexadecanediol-di-*p*-coumaroate (**2**).

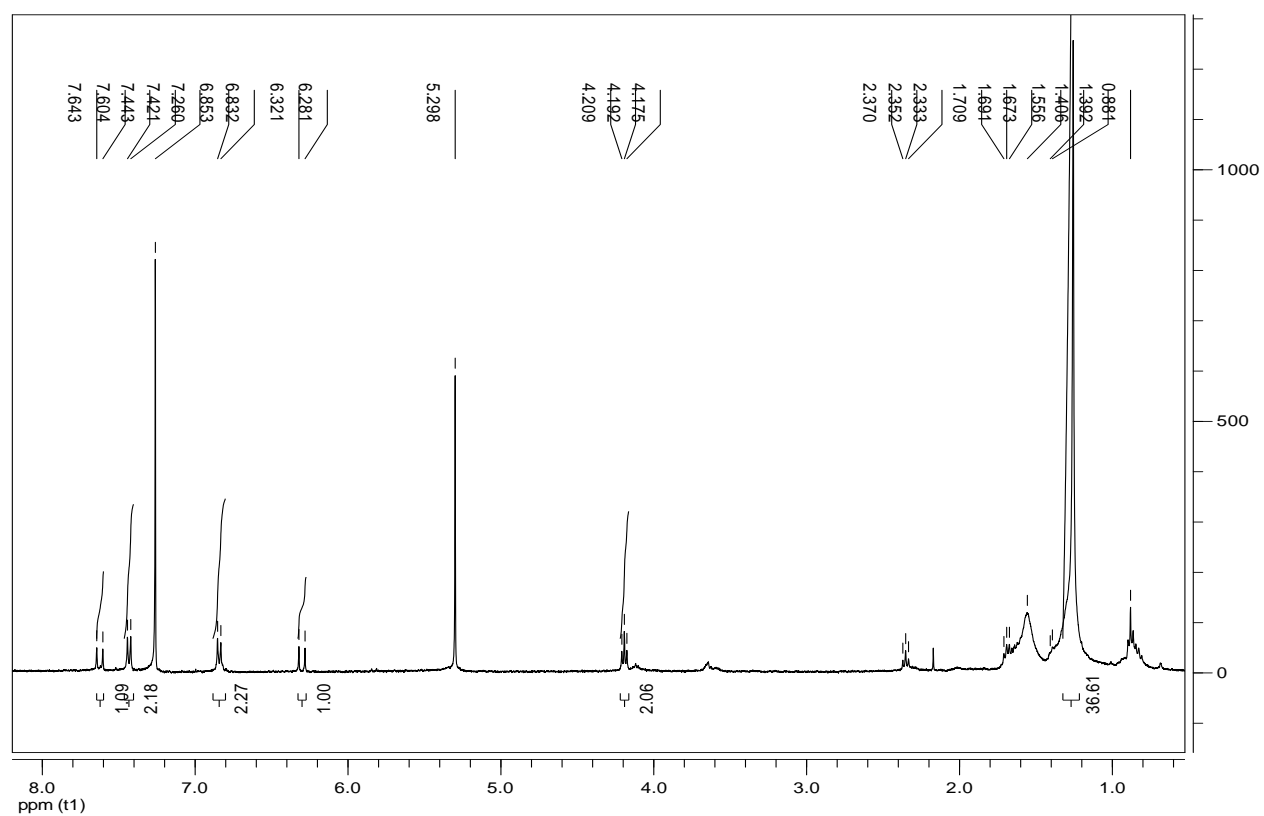

**Figures S4a.**  $^1\text{H}$  NMR spectrum of 1,16-hexadecanediol-di-*p*-coumaroate (**2**).



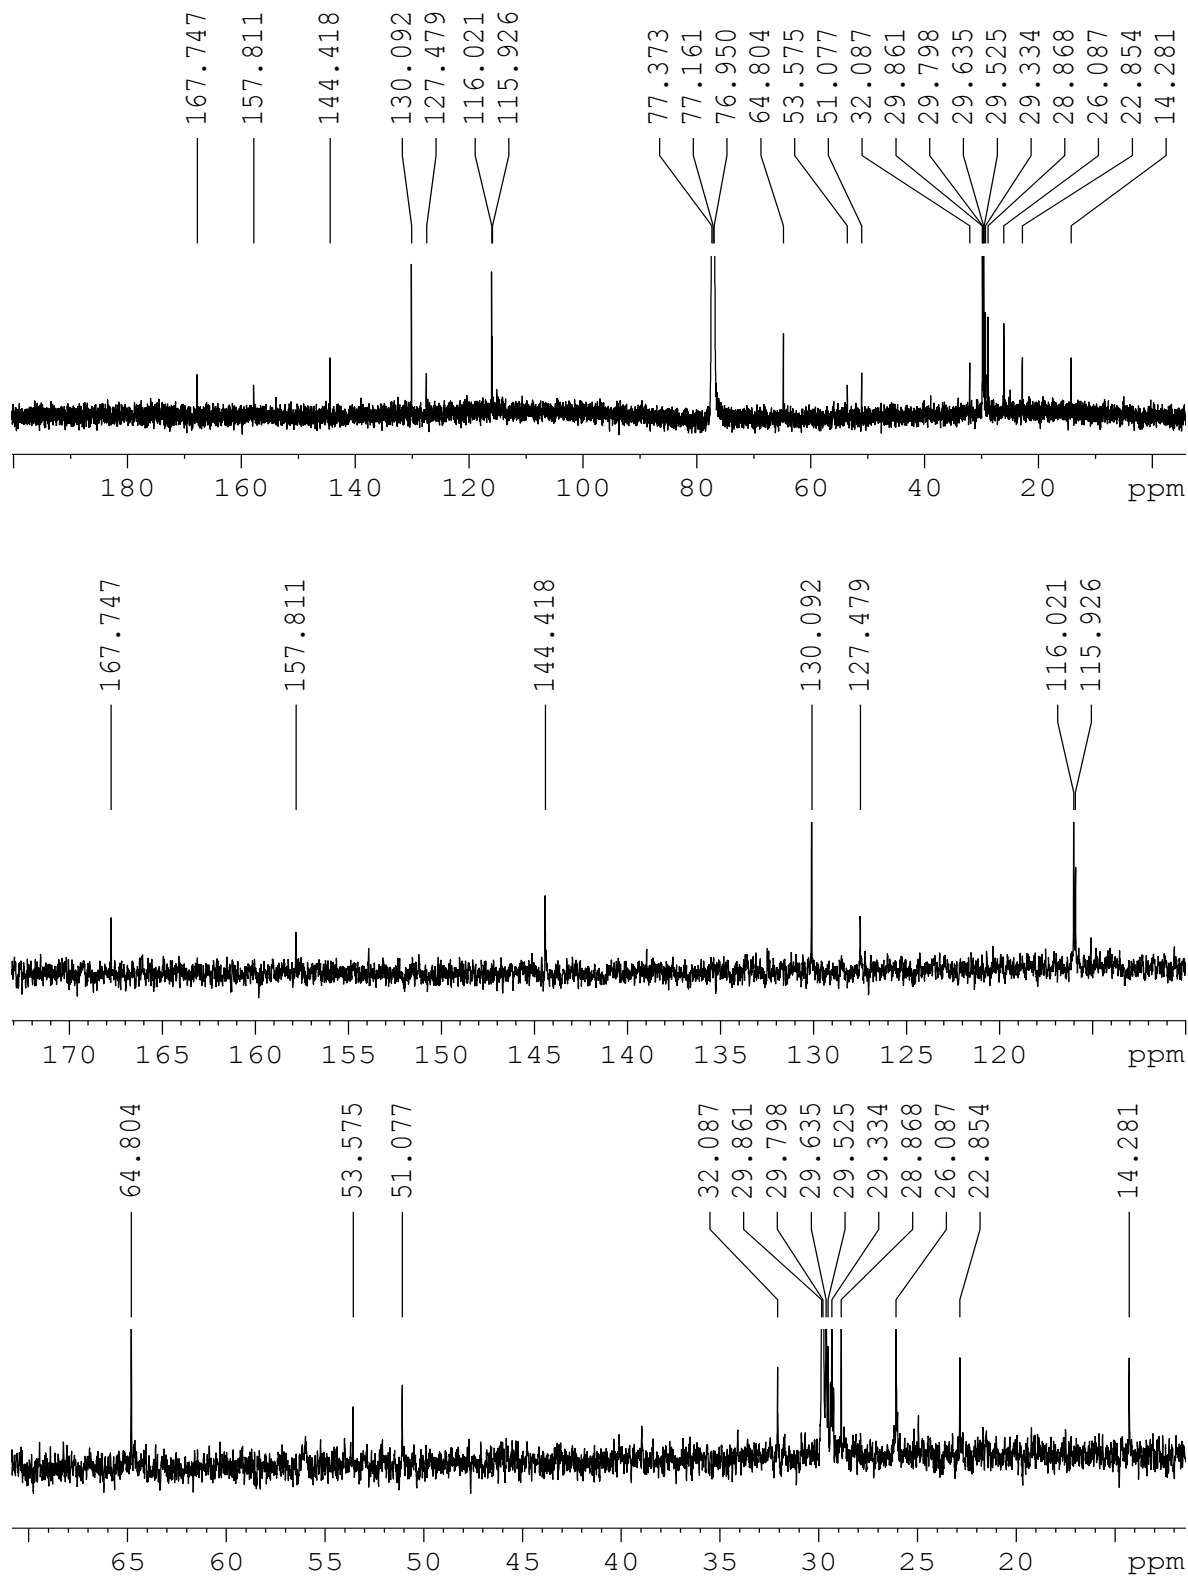

**Figure S4b.**  $^{13}\text{C}$  NMR spectrum of 1,16-hexadecanediol-di-*p*-coumaroate (**2**). Note: The signals at  $\delta_{\text{C}}$  32.1, 22.9 and 14.3 are due to *n*-hexane complexed with **2**.<sup>23,24</sup> The signals at  $\delta_{\text{C}}$  53.6 is due to the trace solvent component of dichloromethane.<sup>24</sup> The signals at  $\delta_{\text{C}}$  51.1 is due to the trace solvent component of MeOH.<sup>24</sup>

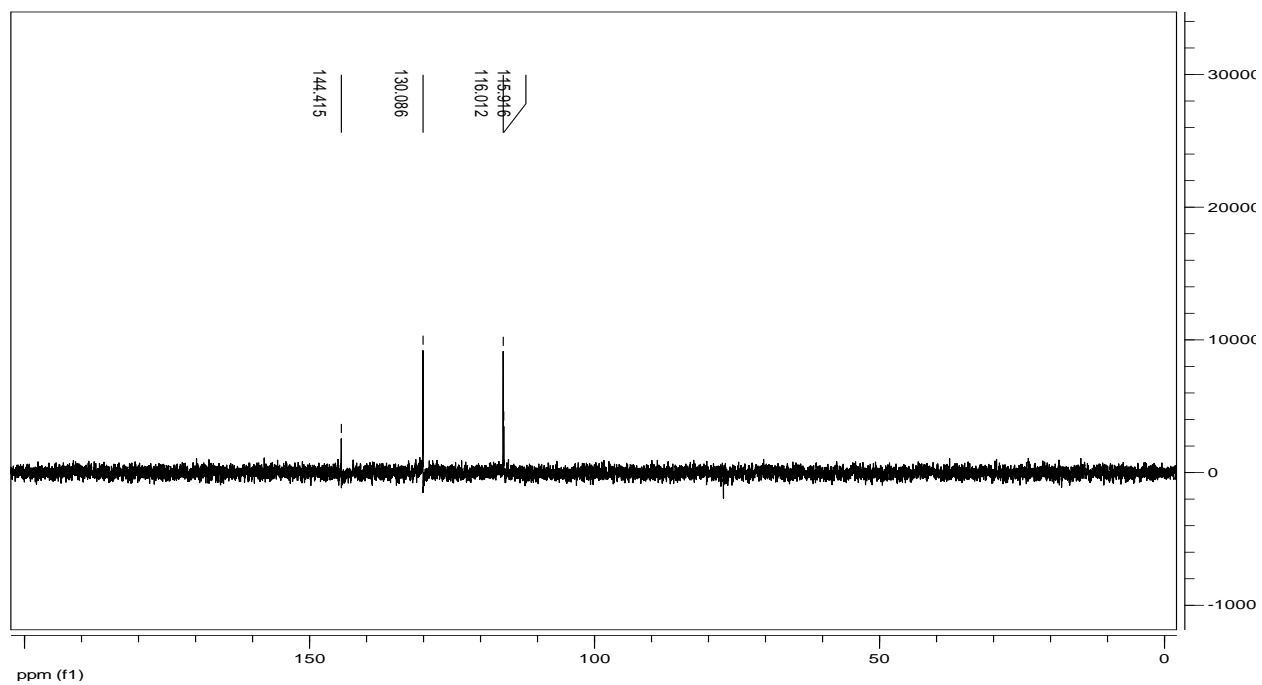

**Figure S4c.** DEPT 90 NMR spectrum of 1,16-hexadecanediol-di-*p*-coumaroate (**2**).

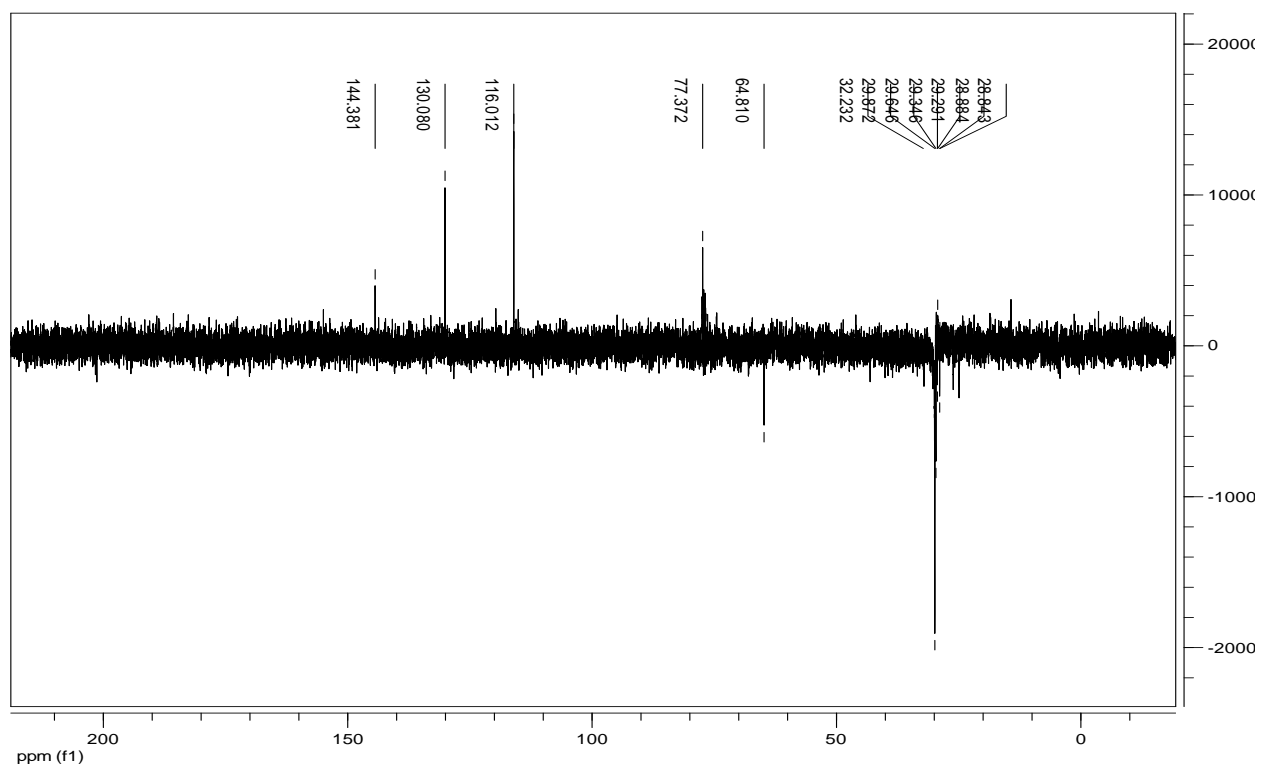

**Figure S4d.** DEPT 135 NMR spectrum of 1,16-hexadecanediol-di-*p*-coumaroate (**2**).

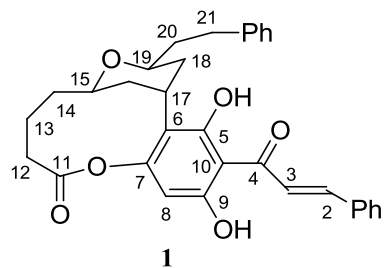

**Figure S5.** Structure indicating the conformation of the ring systems based on Dreiding model for **1**.

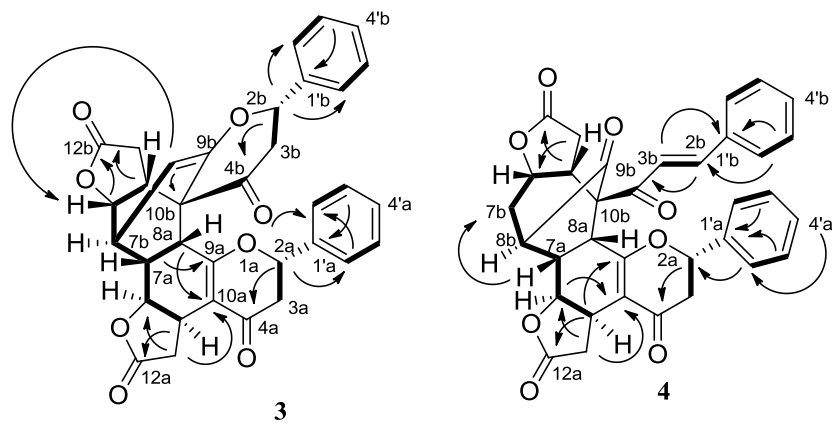

**Figure S6.** COSY (—,  $^1\text{H} \rightarrow ^1\text{H}$ ) and key HMBC (↷,  $^1\text{H} \rightarrow ^{13}\text{C}$ ) correlations of **3** and **4**.

**Table S1. <sup>1</sup>H- and <sup>13</sup>C NMR Spectroscopic Data of Compounds 3 and 4 in CDCl<sub>3</sub>**

| Position <sup>a</sup> | 3                                   |                               | 4                                   |                                             |
|-----------------------|-------------------------------------|-------------------------------|-------------------------------------|---------------------------------------------|
|                       | δ <sub>C</sub> (mult.) <sup>b</sup> | δ <sub>H</sub> <sup>c</sup>   | δ <sub>C</sub> (mult.) <sup>b</sup> | δ <sub>H</sub> <sup>d</sup>                 |
| 2a                    | 79.5 CH                             | 5.38 6 dd (3.6, 14.4)         | 81.0 CH                             | 5.20 dd (3.0, 15.6)                         |
| 3a                    | 40.7 CH <sub>2</sub>                | 2.87 d (8.0)<br>2.93 d (8.8)  | 41.8 CH <sub>2</sub>                | 2.56 dd (2.4, 17.4)<br>2.83 dd (11.4, 16.8) |
| 4a                    | 190.8 C                             |                               | 190.9 C                             |                                             |
| 5a                    | 33.2 CH                             | 3.28 br t (5.2)               | 32.9 CH                             | 3.43 br t (5.4)                             |
| 6a                    | 80.1 CH                             | 4.68 m                        | 79.3 CH                             | 4.80 m                                      |
| 7a                    | 37.0 CH                             | 2.73 br d (8.0)               | 33.9 CH                             | 2.87 br d (8.4)                             |
| 8a                    | 45.3 CH                             | 3.35 d (7.6)                  | 38.4 CH                             | 4.07 d (9.0)                                |
| 9a                    | 168.4 C                             |                               | 169.1 C                             |                                             |
| 10a                   | 112.6 C                             |                               | 111.0 C                             |                                             |
| 11a                   | 37.9 CH <sub>2</sub>                | 2.82 m<br>2.93 d (8.8)        | 37.8 CH <sub>2</sub>                | 2.81 overlap<br>3.08 dd (7.2, 17.4)         |
| 12a                   | 175.1 C                             |                               | 174.6 C                             |                                             |
| 1'a                   | 135.6 C                             |                               | 135.5 C                             |                                             |
| 2'a                   | 126.3 CH                            | 7.22 m                        | 127.1 CH                            | 7.17 d (7.2)                                |
| 3'a                   | 129.1 CH                            | 7.34 m                        | 128.5 CH                            | 6.91 m                                      |
| 4'a                   | 129.6 CH                            | 7.34 m                        | 128.9 CH                            | 6.91 m                                      |
| 5'a                   | 129.1 CH                            | 7.34 m                        | 128.5 CH                            | 6.91 m                                      |
| 6'a                   | 126.3 CH                            | 7.22 m                        | 127.1 CH                            | 7.17 d (7.2)                                |
| 2b                    | 76.1 CH                             | 4.93 m                        | 145.3 CH                            | 7.28 d (15.6)                               |
| 3b                    | 47.2 CH <sub>2</sub>                | 2.55 m                        | 124.0 CH                            | 7.78 d (15.6)                               |
| 4b                    | 204.7 C                             |                               | 195.1 C                             |                                             |
| 5b                    | 40.7 CH                             | 3.20 m                        | 41.8 CH                             | 3.37 m                                      |
| 6b                    | 80.6 CH                             | 4.93 m                        | 78.5 CH                             | 4.92 m                                      |
| 7b                    | 38.9 CH                             | 3.20 m                        | 36.3 CH <sub>2</sub>                | 2.24 br d (18.0)<br>2.72 m                  |
| 8b                    | 100.7 CH                            | 5.29 d (5.6)                  | 34.8 CH                             | 2.72 m                                      |
| 9b                    | 153.7 C                             |                               | 205.9 C                             |                                             |
| 10b                   | 53.6 C                              |                               | 63.0 C                              |                                             |
| 11b                   | 32.5 CH <sub>2</sub>                | 2.07 dd (2.4, 18.8)<br>2.82 m | 30.2 CH <sub>2</sub>                | 2.40 dd (3.0, 19.2)<br>2.80 dd (1.8, 14.4)  |
| 12b                   | 174.5 C                             |                               | 173.9 C                             |                                             |
| 1'b                   | 138.2 C                             |                               | 134.6 C                             |                                             |
| 2'b                   | 125.5 CH                            | 7.16 m                        | 129.2 CH                            | 7.46 m                                      |
| 3'b                   | 129.0 CH                            | 7.38 m                        | 129.3 CH                            | 7.46 m                                      |
| 4'b                   | 129.0 CH                            | 7.38 m                        | 131.2 CH                            | 7.46 m                                      |
| 5'b                   | 129.0 CH                            | 7.38 m                        | 129.3 CH                            | 7.46 m                                      |
| 6'b                   | 125.5 CH                            | 7.16 m                        | 129.2 CH                            | 7.46 m                                      |

<sup>a</sup>Assigned by analysis of <sup>1</sup>H, <sup>13</sup>C, DEPT 90, DEPT 135, COSY, HSQC, and HMBC NMR spectra.

<sup>b</sup>Recorded at 150.9 MHz and referenced to the solvent residual peak at δ 77.16.<sup>24</sup> CH<sub>3</sub>, CH<sub>2</sub>, CH, and C multiplicities were determined by DEPT 90 and DEPT 135 and HSQC experiments.

<sup>c</sup>Recorded at 400.1 MHz and referenced to the solvent residual peak at δ 7.26.<sup>24</sup>

<sup>d</sup>Recorded at 600.2 MHz and referenced to the solvent residual peak at δ 7.26.<sup>24</sup>

**Table S2. <sup>1</sup>H NMR Spectroscopic Data of the Known Compounds from *C. rubra***

| Position*          | 5 <sup>a</sup>                              | 7 <sup>b</sup>                              | S1 <sup>a</sup>                             | S2 <sup>c</sup>                             | S3 <sup>b</sup> |
|--------------------|---------------------------------------------|---------------------------------------------|---------------------------------------------|---------------------------------------------|-----------------|
| 2                  | 7.79 d (15.2)                               | 5.49 m                                      | 5.45 dd (2.8, 12.8)                         | 5.60 dd (2.8, 12.4)                         | 7.55 br s       |
| 3                  | 6.79 d (15.6)                               | 2.74 dd (2.4, 12.6)<br>2.95 dd (10.2, 12.6) | 2.85 dd (2.8, 17.2)<br>3.13 dd (12.8, 16.8) | 2.84 dd (3.2, 17.2)<br>3.21 dd (12.8, 17.2) | 7.42 m          |
| 4                  |                                             |                                             |                                             |                                             | 7.42 m          |
| 5                  | 4.03 m                                      | 3.89 q (7.8)                                |                                             |                                             | 7.42 m          |
| 6                  | 5.49 br d (8.8)                             | 5.49 m                                      | 6.07 d (1.6)                                | 5.97 d (2.0)                                | 7.55 br s       |
| 7                  | 6.56 br d (10.4)                            | 6.29 dd (2.4, 7.8)                          |                                             |                                             | 7.79 d (15.6)   |
| 8                  | 6.23 br d (11.6)                            | 6.10 dd (1.8, 7.8)                          | 6.09 d (2.0)                                | 6.01 d (2.0)                                | 6.48 d (16.2)   |
| 9                  |                                             |                                             |                                             |                                             |                 |
| 10                 |                                             |                                             |                                             |                                             |                 |
| 11                 | 2.66 dd (12.4, 17.6)<br>2.82 dd (8.8, 17.6) | 2.41 dd (7.8, 13.2)<br>2.98 dd (6.6, 13.2)  |                                             |                                             |                 |
| 12                 |                                             |                                             |                                             |                                             |                 |
| 1'                 |                                             |                                             |                                             |                                             |                 |
| 2'                 | 7.58 m                                      | 7.45 m                                      | 7.46 m                                      | 7.58 d (7.2)                                |                 |
| 3'                 | 7.43 m                                      | 7.45 m                                      | 7.46 m                                      | 7.47 m                                      |                 |
| 4'                 | 7.43 m                                      | 7.45 m                                      | 7.46 m                                      | 7.47 m                                      |                 |
| 5'                 | 7.43 m                                      | 7.45 m                                      | 7.46 m                                      | 7.47 m                                      |                 |
| 6'                 | 7.58 m                                      | 7.45 m                                      | 7.46 m                                      | 7.58 d (7.2)                                |                 |
| 4-OH               | 15.99 s                                     |                                             |                                             |                                             |                 |
| 5-OH               |                                             |                                             | 12.02 s                                     | 12.15 s                                     |                 |
| 7-OCH <sub>3</sub> |                                             |                                             | 3.82 s                                      |                                             |                 |

\*Assignments based on analysis of 2D NMR spectra.

<sup>a</sup>Data (δ) measured in CDCl<sub>3</sub> at 400.1 MHz and referenced to the solvent residual peak at δ 7.26.<sup>24</sup>

<sup>b</sup>Data (δ) measured in CDCl<sub>3</sub> at 600.2 MHz and referenced to the solvent residual peak at δ 7.26.<sup>24</sup>

<sup>c</sup>Data (δ) measured in acetone-d<sub>6</sub> at 400.1 MHz and referenced to the solvent residual peak at δ 2.05.<sup>24</sup>

*J* values are presented in Hz. **S1**: (±)-5-hydroxy-7-methoxyflavanone; **S2**: (±)-5,7-dihydroxyflavanone; **S3**: cinnamic acid.

**Table S3. <sup>13</sup>C NMR Spectroscopic Data of the Known Compounds from *C. rubra***

| Position*          | 5 <sup>a</sup>       | 7 <sup>a</sup>       | S1 <sup>a</sup>      | S2 <sup>b</sup>      | S3 <sup>c</sup>      |
|--------------------|----------------------|----------------------|----------------------|----------------------|----------------------|
| 1                  |                      |                      |                      |                      | 134.2 C              |
| 2                  | 142.5 CH             | 81.1 CH              | 79.4 CH              | 80.0 CH              | 128.5 CH             |
| 3                  | 116.8 CH             | 42.9 CH <sub>2</sub> | 43.6 CH <sub>2</sub> | 43.7 CH <sub>2</sub> | 129.1 CH             |
| 4                  | 174.2 C              | 190.4 C              | 195.9 C              | 196.8 C              | 129.1 CH             |
| 5                  | 34.0 CH              | 30.7 CH              | 164.3 C              | 165.1 C              | 129.1 CH             |
| 6                  | 76.3 CH              | 76.8 CH              | 95.3 CH              | 96.9 CH              | 128.5 CH             |
| 7                  | 139.9 CH             | 134.8 CH             | 168.1 C              | 167.4 C              | 147.1 CH             |
| 8                  | 130.7 CH             | 124.3 CH             | 94.4 CH              | 95.9 CH              | 117.0 CH             |
| 9                  | 186.0 C              | 162.7 C              | 162.9 C              | 164.2 C              | 170.2 C <sup>d</sup> |
| 10                 | 103.4 C              | 109.0 C              | 103.3 C              | 103.2 C              |                      |
| 11                 | 35.4 CH <sub>2</sub> | 33.2 CH <sub>2</sub> |                      |                      |                      |
| 12                 | 174.6 C              | 175.6 C              |                      |                      |                      |
| 1'                 | 134.9 C              | 137.7 C              | 138.5 C              | 140.1 C              |                      |
| 2'                 | 128.3 CH             | 126.3 CH             | 126.3 CH             | 127.3 CH             |                      |
| 3'                 | 129.2 CH             | 129.0 CH             | 129.0 CH             | 129.5 CH             |                      |
| 4'                 | 130.3 CH             | 129.3 CH             | 129.0 CH             | 129.4 CH             |                      |
| 5'                 | 129.2 CH             | 129.0 CH             | 129.0 CH             | 129.5 CH             |                      |
| 6'                 | 128.3 CH             | 126.3 CH             | 126.3 CH             | 127.3 CH             |                      |
| 7-OCH <sub>3</sub> |                      |                      | 55.9 CH <sub>3</sub> |                      |                      |

\* Assigned by analysis of DEPT 90, DEPT 135, COSY, HSQC, and HMBC NMR spectra (CH<sub>3</sub>, CH<sub>2</sub>, CH, and C multiplicities were determined by DEPT 90 and DEPT 135 and HSQC experiments).

<sup>a</sup>Data (δ) measured in CDCl<sub>3</sub> at 100.6 MHz and referenced to the solvent residual peak at δ 77.16.<sup>24</sup>

<sup>b</sup>Data (δ) measured in acetone-d<sub>6</sub> at 100.6 MHz and referenced to the solvent residual peak at δ 29.84.<sup>24</sup>

<sup>c</sup>Data (δ) measured in CDCl<sub>3</sub> at 150.9 MHz and referenced to the solvent residual peak at δ 77.16.<sup>24</sup>

<sup>d</sup>Observed in the HMBC 2D NMR spectrum.

**S1:** (±)-5-hydroxy-7-methoxyflavanone; **S2:** (±)-5,7-dihydroxyflavanone; **S3:** cinnamic acid.

### Analytical data of known compounds isolated from *C. rubra*

(+)-Bicaryanone A (**3**): Amorphous colorless powder;  $[\alpha]_D^{20} +161.4$  (*c* 0.07, MeOH); UV (MeOH)  $\lambda_{\max}$  (log ε) 270 (3.83) nm; ECD (MeOH, nm)  $\lambda_{\max}$  (Δε) 305.5 (−4.48), 267.0 (+14.18), 199.5 (+21.81); IR (dried film)  $\nu_{\max}$  2924, 2853, 1782, 1717, 1667, 1615, 1455, 1299, 906, 760 cm<sup>−1</sup>; <sup>1</sup>H and <sup>13</sup>C NMR data, see Table S1; positive-ion sodiated HRESIMS *m/z* 587.1690 (calcd for C<sub>34</sub>H<sub>28</sub>O<sub>8</sub>Na, 587.1682).

(+)-Chalcocaryanone C (**4**): Amorphous colorless powder;  $[\alpha]_D^{20} +220.0$  (*c* 0.01, MeOH); UV (MeOH)  $\lambda_{\max}$  (log ε) 306 (4.02) nm; ECD (MeOH, nm)  $\lambda_{\max}$  (Δε) 320.5 (+1.56), 268.5 (+7.80), 198.5 (+10.0); IR (dried film)  $\nu_{\max}$  2924, 2853, 1784, 1727, 1669, 1603, 1574, 1450, 978,

759  $\text{cm}^{-1}$ ;  $^1\text{H}$  and  $^{13}\text{C}$  NMR data, see Table S1; positive-ion sodiated HRESIMS  $m/z$  587.1686 (calcd for  $\text{C}_{34}\text{H}_{28}\text{O}_8\text{Na}$ , 587.1682).

(+)-Cryptocaryone (**5**): Amorphous yellow powder.  $[\alpha]_{\text{D}}^{20} +183.3$  ( $c$  0.03, MeOH); UV (MeOH)  $\lambda_{\text{max}}$  ( $\log \epsilon$ ) 383 (3.76), 287 (3.55), 235 (3.47) nm; ECD (MeOH, nm)  $\lambda_{\text{max}}$  ( $\Delta\epsilon$ ) 441.5 (+0.24), 384.0 (+2.34), 288.0 (−0.38), 250.0 (+0.50), 236.5 (−0.62), 223.5 (−0.78), 203.0 (+2.61); IR (dried film)  $\nu_{\text{max}}$  3442, 2926, 1778, 1729, 1629, 1579, 1496, 1283, 1022, 933, 831  $\text{cm}^{-1}$ ;  $^1\text{H}$  and  $^{13}\text{C}$  NMR data, see Tables S2 and S3; positive-ion sodiated HRESIMS  $m/z$  305.0780 (calcd for  $\text{C}_{17}\text{H}_{14}\text{O}_4\text{Na}$ , 305.0790).

(+)-Desmethylinfectocaryone (**6**): Amorphous yellow powder;  $[\alpha]_{\text{D}}^{20} +45.0$  ( $c$  0.02, MeOH); UV (MeOH)  $\lambda_{\text{max}}$  ( $\log \epsilon$ ) 380 (3.95), 283 (3.82), 230 (3.82) nm; ECD (MeOH, nm)  $\lambda_{\text{max}}$  ( $\Delta\epsilon$ ) 396.5 (+0.60), 382.0 (+0.68), 272.5 (+0.32), 231.0 (−1.55), 223.5 (−1.66), 201.5 (−0.58); IR (dried film)  $\nu_{\text{max}}$  2924, 2853, 1711, 1630, 1562, 1449, 1281, 759  $\text{cm}^{-1}$ ;  $^1\text{H}$  NMR ( $\text{CDCl}_3$ , 800.1 MHz, referenced to the solvent residual peak at  $\delta$  7.26<sup>24</sup>): 7.71 d ( $J = 15.2$  Hz, H-2), 7.57 d ( $J = 8.0$  Hz, H-2' and H-6'), 7.41 m (H-3'–H-5'), 7.04 d ( $J = 16.0$  Hz, H-3), 6.72 m (H-7), 6.21 dd ( $J = 10.4, 3.2$  Hz, H-8), 2.68 m (H-6 and H-11), 2.48 m (H-6 and H-11); positive-ion sodiated ESIMS  $m/z$  307.1.

(+)-Cryptocaryanones A (**7**): Amorphous colorless powder.  $[\alpha]_{\text{D}}^{20} +20$  ( $c$  0.05, MeOH); UV (MeOH)  $\lambda_{\text{max}}$  ( $\log \epsilon$ ) 319 (3.38) nm; ECD (MeOH, nm)  $\lambda_{\text{max}}$  ( $\Delta\epsilon$ ) 357.5 (−0.48), 313.5 (+0.71), 240.0 (+0.28), 226.0 (−0.56), 204.5 (+0.98); IR (dried film)  $\nu_{\text{max}}$  2923, 2852, 1783, 1731, 1659, 1591, 1427, 1172, 761  $\text{cm}^{-1}$ ;  $^1\text{H}$  and  $^{13}\text{C}$  NMR data, see Tables S2 and S3; positive-ion sodiated HRESIMS  $m/z$  305.0800 (calcd for  $\text{C}_{17}\text{H}_{14}\text{O}_4\text{Na}$ , 305.0790).

(±)-5-Hydroxy-7-methoxyflavanone (**S1**): Amorphous colorless powder;  $[\alpha]_{\text{D}}^{20} 0$  ( $c$  0.06, MeOH); UV (MeOH)  $\lambda_{\text{max}}$  ( $\log \epsilon$ ) 287 (3.87), 212 (4.04) nm; ECD (MeOH, nm)  $\lambda_{\text{max}}$  ( $\Delta\epsilon$ ) No

obvious CE values observed in CD spectrum; IR (dried film)  $\nu_{\max}$  1644, 1575, 1499, 1445, 1091, 827, 741  $\text{cm}^{-1}$ ;  $^1\text{H}$  and  $^{13}\text{C}$  NMR data, see Tables S2 and S3; positive-ion sodiated HRESIMS  $m/z$  293.0784 (calcd for  $\text{C}_{16}\text{H}_{14}\text{O}_4\text{Na}$ , 293.0790).

( $\pm$ )-5,7-Dihydroxyflavanone (**S2**): Amorphous colorless powder;  $[\alpha]_{\text{D}}^{20}$  0 ( $c$  0.1, MeOH); UV (MeOH)  $\lambda_{\max}$  ( $\log \epsilon$ ) 288 (3.77), 210 (3.93) nm; ECD (MeOH, nm)  $\lambda_{\max}$  ( $\Delta\epsilon$ ) No obvious CE values observed in CD spectrum; IR (dried film)  $\nu_{\max}$  3091, 1633, 1586, 1488, 1090, 825, 768  $\text{cm}^{-1}$ ;  $^1\text{H}$  and  $^{13}\text{C}$  NMR data, see Tables S2 and S3; positive-ion sodiated HRESIMS  $m/z$  279.0612 (calcd for  $\text{C}_{15}\text{H}_{12}\text{O}_4\text{Na}$ , 279.0633).

Cinnamic acid (**S3**): Amorphous colorless powder; UV (MeOH)  $\lambda_{\max}$  ( $\log \epsilon$ ) 272 (3.80), 215 (3.69) nm; IR (dried film)  $\nu_{\max}$  1687, 1633, 1581, 1552, 1495, 1450, 1287, 873, 772  $\text{cm}^{-1}$ ;  $^1\text{H}$  and  $^{13}\text{C}$  NMR data, see Tables S2 and S3; positive-ion sodiated HRESIMS  $m/z$  171.0426 (calcd for  $\text{C}_9\text{H}_8\text{O}_2\text{Na}$ , 171.0422).
